# Supplementary material
Source: Springer Nature journal article supplement (https://www.springermedizin.de/resource/supplementary/12885_2009_1767_MOESM3_ESM.pdf/9472892)

H&E

IHC

FISH

Single Cell FISH

Case 1

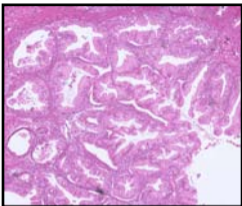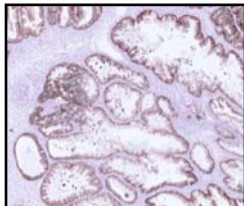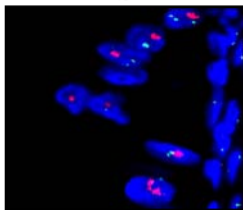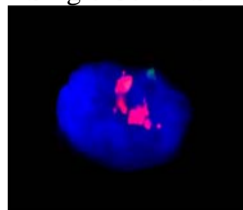

Case 2

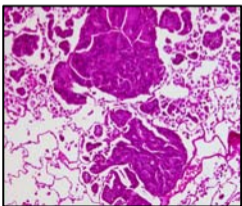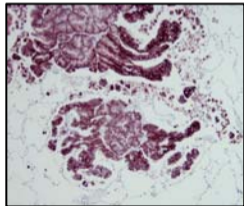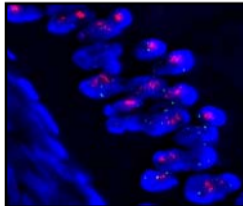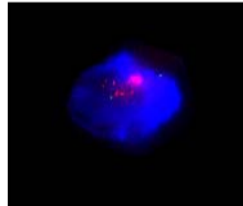

Supplement: MOESM3 [file 9472892]
